# Supplementary material
Source: Springer Nature journal article supplement (https://www.springermedizin.de/resource/supplementary/12933_2002_3_MOESM6_ESM.pdf/9538100)
Supplement: MOESM6 [file 9538100]

Two  
Interweaving  
Threads

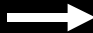

Two  
Common  
Diseases

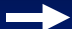

Complex  
Mosaic  
Fabric

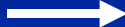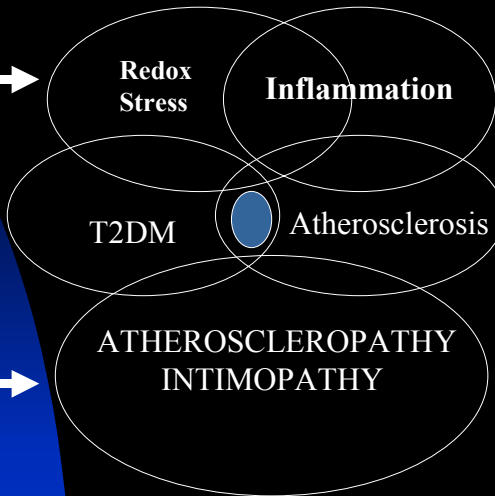

**A-FLIGHT  
TOXICITIES**  
**MS**  
**IR**  
**IGT**  
**IFG**  
**Prediabetes**
